# Supplementary material
Source: MDPI journal article supplement (https://www.mdpi.com/2076-3271/10/2/24)
Supplement: s1 [file s1]

**Supplemental Figure S1.** Multi-sequence alignment of the ODC amino acid

| sequences.     |                                                                |
|----------------|----------------------------------------------------------------|
| L.donovani     | MGDHDVALCHVSRYNHANYWAFVPLPTVSDDTGCDLSLHSDSASKRIRMAPPASASKAGAA  |
| L.major        | MGDHDVALCQVSHYNHANYWDFVPLPTVDDTGCDLSLHSDSERIRMAPPPSASKAGAA     |
| L.braziliensis | -----MMTMVPPVSVLVDVDAV                                         |
| T.brucei       | -----                                                          |
| M.musculus     | -----                                                          |
| H.sapiens      | -----                                                          |
| L.donovani     | EERLHPYERRLLDQYQIHLQPANRNPLSRADSAGREETAQ-----T                 |
| L.major        | EERLPPCERRLLDQYHIHLQPANRNPLSRADSAGRKEAAE-----T                 |
| L.braziliensis | PDRLHTCKRRLLEQYHIDRSRITLNLPLSRANTTAGRNEAAQLSDVDAQQPILPTECNKQT  |
| T.brucei       | -----                                                          |
| M.musculus     | -----                                                          |
| H.sapiens      | -----                                                          |
| L.donovani     | PAQVQMVSGVAVADSTSDQHASVASSQDLVDLFFLEGSQAVDGLCFSPYPIYGWRTAEER   |
| L.major        | PAQVQMMACVAAADSTADQHPAVAATQDLVDLFFLEGSQAVDGLCFSPYPIYGWRTAEER   |
| L.braziliensis | PEYVQEVALGAAADSTVNQHTAVAASQDIVDLFFLEGSQAVNGLCFSPYPTYGWRTAEER   |
| T.brucei       | -----                                                          |
| M.musculus     | -----                                                          |
| H.sapiens      | -----                                                          |
| L.donovani     | RAAVCEVFKTYNVVTRLPASPAALAAARRRYSRRHSIAIPINKSAETREQYWRRLSNL     |
| L.major        | RAAVCEVFKAYNVVTRLPASPAALAAARRRDSRHQSIAIPINKSVETREQYWRRLSNL     |
| L.braziliensis | RAATYAVFKKYNVATHLPASPAALATAQHSHSHHQHASIHAINKMAETREQYWRRLSNV    |
| T.brucei       | -----MDHVVDNL-----SCR                                          |
| M.musculus     | -----MSSFTKDEF-----DCH                                         |
| H.sapiens      | -----MNNFGNDEF-----DCH                                         |
| L.donovani     | YIQKGVKDAASADAATAATTATNGAVPAAPAYEPEDPFYIIDLGRVVEQMARWRHELMVR   |
| L.major        | YIQKGVKDAASADAATAATTATNGAVPAAPAYEPEDPFYIIDLGRVVEQMARWRHELMVR   |
| L.braziliensis | YIEKGVKAAAATA-AATTTFTNCTISGVPRHEPEDPFYIIDLGRVVEQMARWRHELMVR    |
| T.brucei       | FL-EGFN-----TRDALCKKIS-MNTCDEGDPFFVADLGDIVRKHEWKKCLPRVT        |
| M.musculus     | ILDEGFT-----AKDILDQKINEVSSSSDDKDAFYVADLGDILKKHLRLNLKALPRVT     |
| H.sapiens      | FLDEGFT-----AKDILDQKINEVSSSSDDKDAFYVADLGDILKKHLRLNLKALPRVT     |
| L.donovani     | PYFAVKSNPQPAVLEVLGALGAGFDCASKEEIHMLVGLHQLVASPDDIIFANPCKQLGDLR  |
| L.major        | PYFAVKSNPQPAVLEVLGALGAGFDCASKEEIHMLVGLRHVLVASPDDIIFANPCKQLGDLR |
| L.braziliensis | PYFAVKSNPQALALEVLGALGSGFDCASKEEITVLVDNLHVLVASPDDIIFANPCKQPGDMR |
| T.brucei       | PFYAVKCNDDWRVLGTLAALGAGFDCASNTQIRVRG--GVPFERKIYANPCKQNSHIR     |
| M.musculus     | PFYAVKCNDSRAHVTLLAALGAGFDCASRTEIQVLQGL--GVPAERVIYANPCKQVSGIK   |
| H.sapiens      | PFYAVKCNDSKATVKTLLAALGAGFDCASRTEIQVLQVSL--GVPFERVIYANPCKQVSGIK |
| L.donovani     | EAQACGVTVTVTDNPLEMERISRLMPSAHAIIRIKTNDSKAOCSPSTKFGAPLEDVEGLL   |
| L.major        | EAQACGVTVTVTDNPLEMERISRLMPSAHVIRIKTNDSKAOCSPSTKFGAPLEDVDGLL    |
| L.braziliensis | EAQARGVTYTVTDNLLTEKISRLMPSARAVIRIKTNDSKAKAFSPKFCVPLNDVESLL     |
| T.brucei       | YARDSGVDVMTFDCVDETEKVAETHPKAKMLVRISTDLSLARCRLSVKFGAKVEDCRFIL   |
| M.musculus     | YAAANGVQVMTTFDSEIELMKVRAHHPKAKLVLRITATDSDKAVCRLSVKFGATLRTSRLLL |
| H.sapiens      | YAAANGVQVMTTFDSEVELMKVRAHHPKAKLVLRITATDSDKAVCRLSVKFGATLRTSRLLL |
| L.donovani     | EAAKRFNVTVVCGVSFHVGSQNDQSAVVSAVRDAYHVFQQAQVYGFCKTLLDIGGGFPGT   |
| L.major        | KVARQLNVAVCGVSFHVGSQNDQSAVLSAVRDAYHVFQQAQVYGFCKTLLDIGGGFPGT    |
| L.braziliensis | QAAKRFKVDVVGVSFHVGSQNDPATVVSAVRDAYHVFQQAQVYGFNCTLLDIGGFPFV     |
| T.brucei       | EOAKKLNLDVVGVSFHVGSQNDASTFAQAISDSRFVDMGTGLFNMHLLDIGGGFPGT      |
| M.musculus     | ERAKELNLDVVGVSFHVGSQNDPETFVQAISDARCVDMGAEVGFSMYLLDIGGGFPGS     |
| H.sapiens      | ERAKELNLDVVGVSFHVGSQNDPETFVQAISDARCVDMGAEVGFSMYLLDIGGGFPGS     |
| L.donovani     | EVVEGSGNTSFETARTIRPVLAEELFGG-GDVTTIIEPGRYFTAASHALLMNVFASRTLRL  |
| L.major        | EVVQSGSGNTSFETARTIRPVLAEELFGG-GDVTTIIEPGRYFTAASHALLMNVFASRTLRL |
| L.braziliensis | ETNTASGEATFEDTARIRPVLAEELFGG-GDVTTIIEPGRYFTAASHALLMNVFASRKLRL  |
| T.brucei       | RDA---PLKFEETAGVNNALDKHFFPDLLKTIIVAEPRGYVASAFTLAVNVIKAKTVTP    |
| M.musculus     | EDT---KLKFEETITGVNIPALDKYFPDSGSGVRIIAEPGRYVASAFTLAVNIIAKKTVW   |
| H.sapiens      | EDV---KLKFEETITGVNIPALDKYFPDSGSGVRIIAEPGRYVASAFTLAVNIIAKKIVL   |
| L.donovani     | LSDVEV-SRQAFQSVVSMDEPEEYOYYVNDGVLHSPNCILYDHAHPTLLLLNDGDGADGV   |
| L.major        | LSDVEV-SRQAFQSVVSMDEPEEYOYYVNDGVLHSPNCILYDHAHPTLLLLNDGDGADGV   |
| L.braziliensis | MSDVEKASSQALQSVVPMDEPEEYOYYVNDGVLHSPNCILYDHAHPTLLLLNDGDGADGV   |
| T.brucei       | GVGTQDVG-----AHAESNAQSFMYVNDGVYGSFNCILYDHAHVRLPLQRE-----       |
| M.musculus     | KEQPGSD-----DEDESNEQTFMYVNDGVYGSFNCILYDHAHVRLKQKR-----         |
| H.sapiens      | KEQTQSD-----DEDESSEQTFMYVNDGVYGSFNCILYDHAHVRLKQKR-----         |
| L.donovani     | ESGTEAAAVCSEEEGETSLSGPLANDPLFMSAWDRRRSFARRPLRITITFGPTCDSDMDCI  |
| L.major        | KSGTAAAVCSEEEGGMSLGLVNDPLFVSAWDRRRSFARRPLRMTITFGPTCDSDMDCI     |
| L.braziliensis | EGNKE-----EGETSL-----SRTRELRITITFGPTCDSLDCI                    |
| T.brucei       | -----PIPNKELYPSSVWGPTCDGLDOI                                   |
| M.musculus     | -----PKPDEKYYSSSIWGPTCDGLDRI                                   |
| H.sapiens      | -----PKPDEKYYSSSIWGPTCDGLDRI                                   |
| L.donovani     | LKKQFFPENKLGDWLLVDPDMGSYTTAAAGFFNFGPATRRLEWVSSVDLCARPRPV-----  |
| L.major        | LKKQFFPENKLGDWLLVDPDMGSYTTAAAGFFNFGPATRRREWVSSVNLICARPRPV----- |
| L.braziliensis | LRKQFFPENKLGDWLLVDPDMGSYTTAAAGFFNFGPATRRFEWVSSIAL-----         |
| T.brucei       | VERXYLPEMVGWLLFEDMGAYTVVGTSSFFNGFQSPRTIYYVSGLPDHVVRRLKQSKGS-   |
| M.musculus     | VERCNLPEMVGWMLLFENMGAYTVAAASTFNCFORPNIIYYVSGPWLQMLKQIQSGGFP    |
| H.sapiens      | VERCDLPEMVGWMLLFENMGAYTVAAASTFNCFORPTIYYVSGPAWQLMQQFQNPDPF     |
| L.donovani     | ---YTREGN---TLRCVSE-----                                       |
| L.major        | ---YTREGN---TLRCMSE-----                                       |
| L.braziliensis | ---                                                            |
| T.brucei       | ---                                                            |
| M.musculus     | PEVEEQDGTLPSCAQESGMDRHPAACASARINV                              |
| H.sapiens      | PEVEEQDASTLPVSCAWESEGMKRHRACASASINV                            |

Sequences from *L. donovani* BPK282A1 LdBPK\_120105.1, *L. major* Friedlin LmjF.12.0280, *L. braziliensis* MHOM/BR/75/M2904 LbrM.12.0300, *T. brucei* brucei TREU927 Tb927.11.13730, *Mus musculus* NP\_038642.2, *Homo sapiens* P11926 were aligned using Clustal Omega. Boxshade was utilized to illustrate identical (black), conserved (grey) and divergent residues (white).

**Supplemental Figure S2.** Multi-sequence alignment of the ADOMETEDC amino acid sequences.

|                 |                        |                 |              |              |                       |                    |
|-----------------|------------------------|-----------------|--------------|--------------|-----------------------|--------------------|
| L. donovani     | MNVCSNNTKDPPLTLAMAMWGS | MKGYNPEQGF      | SFEGPEKRLEVL | RLCTLETH     | ---VDGLRSL            |                    |
| L. major        | MNVCSNNTKDPPLTLAMAMWGS | MKGYNPEQGF      | SFEGPEKRLEVL | RLSTLETH     | ---VDGLRSL            |                    |
| L. braziliensis | MNVSLNNTKDPPLTLAMAMWGS | MKRYNPEQGF      | SFEGPEKRLEVL | RLCTLETH     | ---VDGLRSL            |                    |
| T. brucei       | ----MSSCKDSL           | SLAMAMWGS       | IARFDPKHER   | SFEGPEKRLEVL | MRVVDGTH---VSGLLAH    |                    |
| T. cruzi        | ----MLSNKDP            | PLSLAMAMWGS     | VKGYPD       | NQAS         | SFEGPEKRLEVL          | MRITDETH---SEGLHAL |
| M. musculus     | -----                  | MSAAH           | FFECTEK      | LLEVV        | FSRQSD                | ASQSGDLRTI         |
| H. sapiens      | -----                  | MSAAH           | FFECTEK      | LLEVV        | FSRQSD                | PANQSGDLRTI        |
| L. donovani     | DDSVWSGVVGSLNAQIVS     | RESNECINYSVLT   | ESSLFV       | MKNRIL       | ILITCGTTTLLNSIPNII    |                    |
| L. major        | DDSVWSGVVGSLNAQIVS     | RESNEYINSYLT    | ESSLFV       | MKNRIL       | ILITCGTTTLLNSIPNII    |                    |
| L. braziliensis | DDSVWTRVVGSLNAQIVS     | REANEYINSYLT    | ESSLFV       | MKNRIL       | ILITCGTTTLLNSIPNII    |                    |
| T. brucei       | DDDVWQKVIDAICAHIVSR    | NEFYIRSYVLS     | ESSLFV       | MKDRIL       | ILITCGTTTLLNCVPLIC    |                    |
| T. cruzi        | GDGVWKGVVGSLNAQIVS     | REANEYIRSYVLT   | ESSLFV       | MKDRIL       | ILITCGTTTLLNAVEFVL    |                    |
| M. musculus     | PRSEWDVLLKDVQCS        | IISVTKTDKQEA    | YVLS         | ESSMFVSKRR   | FILKTCGTTLLKALVPLL    |                    |
| H. sapiens      | PRSEWDILLKDVQCS        | IISVTKTDKQEA    | YVLS         | ESSMFVSKRR   | FILKTCGTTLLKALVPLL    |                    |
| L. donovani     | EAISAVRGELEWV          | ---SPMHKNYSFP   | WQKGPHTSLADE | FATLKQHF     | FPCKPPIFGPVDS         |                    |
| L. major        | EAISAVRGELEWV          | ---SPMHKNYSFP   | WQKGPHTSLADE | FATLKQHF     | FPCKPPIFGPVDS         |                    |
| L. braziliensis | EAISAVRGELEWV          | ---SPMHKNYSFP   | WQKGPHTSLADE | CAATLKQHF    | FPCKPPIFGPVDS         |                    |
| T. brucei       | EAVSTVCGEVEWV          | ---SPMHKNYSFP   | WQKGPHTSLADE | FATLKQHF     | FPCKPPIFGPIDSD        |                    |
| T. cruzi        | EAVSDVRGEVEWV          | ---SPMHKNYSFP   | WQKGPHTSLADE | FATLKQHF     | FPCKPPIFGPIDSD        |                    |
| M. musculus     | KLARDYSGFDSIQSF        | FYSRKNFMKPS     | HQGYPHRN     | FQEEIEFL     | NAIFNCAAYCMCRMNSD     |                    |
| H. sapiens      | KLARDYSGFDSIQSF        | FYSRKNFMKPS     | HQGYPHRN     | FQEEIEFL     | NAIFNCAAYCMCRMNSD     |                    |
| L. donovani     | HYFLFCYDDIIRPC         | SEDDTQLSMTMYGLD | KEQTKHW      | FSDRFIST     | SAETAAIRAATHLDR       |                    |
| L. major        | HYFLFCYDDIIRPC         | SEDDTQLSMTMYGLD | KEQTKHW      | FSDRFIST     | SAETAAIRAATHLDR       |                    |
| L. braziliensis | HYFLFCYDDIIRPC         | SEDDTQLSMTMYGLD | KEQTKHW      | FSDRSIST     | NAETAIRATHLDR         |                    |
| T. brucei       | HYFLFYDSDVVP           | SCSDAQLSMTMYGLD | RNQRKH       | WSDRMLPT     | GTAVIREATGLSE         |                    |
| T. cruzi        | HYFLFYDSDVVP           | SCSDAQLSMTMYGLD | RNQRKH       | WSDRMLPT     | GTAVIREATGLSE         |                    |
| M. musculus     | CWYLYTLDFPESR          | VISOPDQTEIL     | MSELDPAVMDQ  | FYMKD---     | GVTAKDVTRESGIRD       |                    |
| H. sapiens      | CWYLYTLDFPESR          | VISOPDQTEIL     | MSELDPAVMDQ  | FYMKD---     | GVTAKDVTRESGIRD       |                    |
| L. donovani     | VVDGVTWLHDLOF          | PCGYSINAIR      | DEEYQTMHIT   | PEDEHCSF     | ASYETNSRAANYSDRMKK    |                    |
| L. major        | VVDGVTWLHDLOF          | PCGYSINAIR      | DEEYQTMHIT   | PEDEHCSF     | ASYETNSRAANYSDRMKK    |                    |
| L. braziliensis | VVDNSWTLHDLOF          | PCGYSINAIR      | DEEYQTMHIT   | PEDEHCSF     | ASYETNSRAANYSDRMKK    |                    |
| T. brucei       | VVDSDWTLHDLOF          | PCGYSINAIR      | GSEYQTMHIT   | PEDEHCSF     | ASYETNTCALNYSKCICG    |                    |
| T. cruzi        | VADDSWTLHDLOF          | PCGYSINAIR      | GSEYQTMHIT   | PEDEHCSF     | ASYETNTPAVNYSERINT    |                    |
| M. musculus     | LIPGSVIDATL            | FNPCGYSMNGMKS   | DGYVWTHIT    | PEPEFS       | SVSFETNLSQTSYVDLIRK   |                    |
| H. sapiens      | LIPGSVIDATL            | FNPCGYSMNGMKS   | DGYVWTHIT    | PEPEFS       | SVSFETNLSQTSYVDLIRK   |                    |
| L. donovani     | VLGVFRPQRF             | TVIVFLDP        | ESPVGKAYNECK | GIG----      | VEPEYYPEYNLLHRTTNEFAP |                    |
| L. major        | VLGVFRPQRF             | TVIVFLDP        | ESPVGKAYNECK | GIG----      | VEPEYYPEYSLHRTTNEFAP  |                    |
| L. braziliensis | VLGVFRPQRF             | TVIVFLDP        | ESPVGKAYNECK | GIG----      | VEPEYYPEYRVLHRTTNEFAP |                    |
| T. brucei       | VLRVFDPERF             | SVIVFLDP        | DSAVGKSYHSG  | CTIG----     | VEPEYYPYEAHQHRTVNEFAP |                    |
| T. cruzi        | VLGVFAPRFR             | SVIVFLDP        | DSVGRLYQK    | CNVG----     | VEPEYYPKYLEQNRVTNEFAP |                    |
| M. musculus     | VVEVFRPCKF             | VTTFLVNQSS      | SKCRTVLS     | SPQKIDG      | FKRLDCOSAMFNDYNFVFTS  |                    |
| H. sapiens      | VVEVFRPCKF             | VTTFLVNQSS      | SKCRTVLS     | SPQKIDG      | FKRLDCOSAMFNDYNFVFTS  |                    |
| L. donovani     | GYVAMKIN               | YVRTAAVEETD     | TAUVGGAEP    | GAEGGPD      |                       |                    |
| L. major        | GYVAMKIN               | YVRTAAVEETD     | AAVGAEP      | GAKSGPD      |                       |                    |
| L. braziliensis | GYVAMKIN               | YIKTTALQ        | EANA         | AAV          |                       |                    |
| T. brucei       | GHWLVK                 | VNVKRAVGT       | VTGS         | SAASGAKE     |                       |                    |
| T. cruzi        | GYVVMK                 | MYAMRAE         | VAEKD        | STD          | PVEE                  |                    |
| M. musculus     | -----                  | FAKKQ           | QQQQS        | -----        |                       |                    |
| H. sapiens      | -----                  | FAKKQ           | QQQQS        | -----        |                       |                    |

Sequences from *L. donovani* BPK282A1 LdBPK\_303150.1, *L. major* Friedlin LmjF.30.3110, *L. braziliensis* MHOM/BR/75/M2903 LBRM2903\_300037800, *T. brucei* brucei TREU927 Tb927.6.4410, *T. cruzi* CL TcCL\_ESM01038, *Mus musculus* NP\_033795.1, *Homo sapiens* NP\_001625.2 were aligned using Clustal Omega. Boxshade was utilized to illustrate identical (black), conserved (grey) and divergent residues (white).



# Supplemental Figure S3. Multi-sequence alignment of the prozyme amino acid sequences.

|             |                                                                                                  |
|-------------|--------------------------------------------------------------------------------------------------|
| L. donovani | -----MSLWGGFNSNPTYSDSGLEKRLEFDFAAAVDVRTFTVEEL                                                    |
| L. major    | MPTNSWASSRDVFPESVURALMSLWGGFNSNPTSYSDSGLEKRLEFDFAAAVDVQTFAVEEL                                   |
| T. brucei   | -MSVTRINQQTCEPSSVHDLVSCWGGCTQSKSTDSGLEKRFELNFAQPDIGTGTVKQL                                       |
| T. cruzi    | MLESTWAAAREEVPESVHALMAMWGGFDGPRNANDCGTEKRLELDFRGVIVPSEVSVLDL                                     |
| L. donovani | EEVLAAAGQRLQEHSSADGLLSLEMTQCIILTPCKLVVTSASEVMLHQVITPTIALLLTS                                     |
| L. major    | EDVLAAGQKRLQEHFSAEGLLSLEMTQCIILTPCKLVVTSASEVMLHQVITPTIALLLTS                                     |
| T. brucei   | ASVMERAGESLRQNSAELGIHTLKFDRLVFTAKQIVVRSSVSVMLHEAVHPMLELMRS                                       |
| T. cruzi    | ESVMSHAGELLERHSAEKGILISLVFGNSLMQLTORHVIIVTSSSSSVLLHEILGPLLDLLRS                                  |
| L. donovani | KGVRVEWASYLRKNITSPWCAESEMSDIMAQEAELKAAPFAGKSF LTGPVDGHHCFNFV                                     |
| L. major    | KGVRVEWASYLRKNITSPWCAESEMSDIMAQEAELKAAPFAGKSF LTGPVDGHHCFNFV                                     |
| T. brucei   | HNIIVDWASFMRVNYGSPWDMTSETSDIMAHEYAE LKSAFP TGH PYLA GPVDRDHCFYFV                                 |
| T. cruzi    | HGIDIEWASFMRMNTSPWSSLC E M S E I M A Q E Y A Q L K S V F P S G H P Y L T G P L D S D H F F Y F V |
| L. donovani | YDNVERM--AGRKEEDVQVNVFLYDVAAGL----EEVDKTTORFHALQS GEYEV MR TFA-                                  |
| L. major    | YDNVERI--AGRKEEDVQVNVFLNDVAAGL----EEVNKTTORFHALQS GEYEV MR TFA-                                  |
| T. brucei   | YDGI DRDPSSCRFENDVQINVYMYNVQADDEYDLDGNTKEQQLLVSHCAGEYETLRVSTY                                    |
| T. cruzi    | YDAIERNVLGAPPEDDVQINVYMYNVKTDGSGDDDDALKSVQOVVPLSET EY EMLRVST                                    |
| L. donovani | --GVPCISFETNAKAAVAS-PTRVQKLLDTFQPAHFTVAALQDRDA DGLALRRNFNSFTP                                    |
| L. major    | --GVPCISFETNAKAAVAS-PTRVQKLLDTFQPTHFTVAALQDRDADESALRCNFNAFTP                                     |
| T. brucei   | GSTHPFASFETNAVSAASDITKIVNGLLKKFYPERVLLVLLQDRDAQGTACGVMDRLEG                                      |
| T. cruzi    | NMAHPFAAFETNSMIAATKKRELVRGLLEKFCPDRFTMVVLQDRCSPLAQKGSIFDEMEG                                     |
| L. donovani | YTLQNRITVNLFGEGYAFHQLLFARSAD                                                                     |
| L. major    | YTLQNRITVNLFGEGYAFHQLLFARSAD                                                                     |
| T. brucei   | FTVVERGANHFHFGG GYVFHQATYARSA-                                                                   |
| T. cruzi    | YTIMNRATNHFHFGG GYAFHQTSYIRAE-                                                                   |

Sequences from *L. donovani* BPK282A1 LdBPK\_303160.1, *L. major* Friedlin LmjF.30.3120, *T. brucei* Lister strain 427 Tb427.06.4470, *T. cruzi* CL Brener Esmeraldo-like TcCLB.509167.110 were aligned using Clustal Omega. Boxshade was utilized to illustrate identical (black), conserved (grey) and divergent residues (white).

# Supplemental Figure S4. Multi-sequence alignment of the SPDSYN amino acid

| sequences.     |                                                                 |
|----------------|-----------------------------------------------------------------|
| L.donovani     | -----MPGGCLLPDGWFREESTMWPGQAQGLKVEKVLVDQPTFQHLTVFESDPFG         |
| L.major        | -----MPGGCLLPDGWFREESTMWPGQAQGLKVEKVLVDQPTFQHLTVFESDPFG         |
| L.braziliensis | -----MPGGCLLPDGWFREKSSMWPGQAQGLKVEKVLVDQPTFQHLTVFESDPKG         |
| T.brucei       | -----MPGGLLADGWFREENGQWPGQAMSFKEVLELDTPTKFOHLSIFEIDPKG          |
| T.cruzi        | -----MPGSELISGGWFRENDQWPGQMSLKEVVKLVLDAPTKEOHLTIFESDPKG         |
| M.musculus     | MEFGPDGPAAGGPAAIRGWFRETCSLWPGQALSLQVEQLLHRRRSRYQDILVERSK--      |
| H.sapiens      | MEFGPDGPAASGPAIREGWFRETCSLWPGQALSLQVEQLLHRRRSRYQDILVERSK---     |
|                |                                                                 |
| L.donovani     | PWGTVMTLDGVIQLTDYDEFVYHEMLANLSITCHHKPERVLIIIGGGDGGVVRVLRHKSE    |
| L.major        | PWGTVMTLDGAIQLTDYDEFVYHEMLANLSITACHHKPERVLVIIGGGDGGVVRVLRHKSE   |
| L.braziliensis | PWGTVMTLDGAIQLTDYDEFVYHEMLANLSITCHHKPERVLVIIGGGDGGVVRVLRHKSE    |
| T.brucei       | PWGTVMLDGCIQLTDYDEFVYHEMLSHTPLCAHPEDVDVLIIGGGDGGVVRVLRHG--      |
| T.cruzi        | PWGTVMALDGCIVTDYDEFVYHEVLGHTSLCSHPKPERVLIIGGGDGGVVRVLRHG--      |
| M.musculus     | TGYNVLVDGVIQCTERDEFVYQEMTANLPLCSHPNPKRVLIIGGGDGGVVRVLRVHKP--    |
| H.sapiens      | TGYNVLVDGVIQCTERDEFVYQEMTANLPLCSHPNPKRVLIIGGGDGGVVRVLRVHKP--    |
|                |                                                                 |
| L.donovani     | KDGIQVSVELVDIDGAVIQQSKKHFPQIACCFANPCVTATVGDGAAFVKRAPDSVYDVII    |
| L.major        | KDGIQVSVELVDIDGAVIQQSKKHFPQVACCFANPCVTATVGDGAAFVRNVPSVYDVII     |
| L.braziliensis | KGIQVSVELVDIDGAVIEQSKRHFPQIACCLANPCVTAMVGDDGVAFGVGNAPDNVDVVI    |
| T.brucei       | ---TVKRCVLDVIDGQDVIEASKKYPQIISCSFSDPRADVVRGQGVAFVREAASESFVVI    |
| T.cruzi        | ---TVEHCDLVDIDGVEQSKQHFPQISCSLTDPRATVRVGQGLAFVRQTPDNTYDVVI      |
| M.musculus     | ---SVESVQCEIDEDVIEVSKKFLPGMAVCFSSSKLTLHVGDGFEMKQNG--DAFDVVI     |
| H.sapiens      | ---SVESVQCEIDEDVIVSKKFLPGMATCYSSSKLTLHVGDGFEMKQNG--DAFDVVI      |
|                |                                                                 |
| L.donovani     | IDTTDPKGPASELFGADFYTNVLRILRPGGVVVCNQGESSVWLRHPLIEKMMGFLKKDIGFA  |
| L.major        | IDTTDPKGPASELFGADFYTNVLRILRPGGVVVCNQGESSVWLRHPLIEKMMGFLKKDIGFA  |
| L.braziliensis | IDTTDPKGPASELFGAEFYKNVRLILRPGGVVVCNQGESIWLHRPLIEKMMFLKKDIGFT    |
| T.brucei       | IDTTDPDGPAAELFGEKFYRDVLRILKPRGICCNQGESVWLNRLNLIQWADFINKVGFA     |
| T.cruzi        | IDTTDPAGPASELFGAEFYKDVLRILKPDGICCNQGESIWLDLDLIEKMSRFIR--ETGFA   |
| M.musculus     | TDSSDPMGPAESLFKESYQLMKTKALKEDGVLCCQGEQWNLHLDLIEKMRHFCNS--LFP    |
| H.sapiens      | TDSSDPMGPAESLFKESYQLMKTKALKEDGVLCCQGEQWNLHLDLIEKMRHFCNS--LFP    |
|                |                                                                 |
| L.donovani     | TVKXYAMIYIPTPYCGSIGTLVCAKSADTDVTVPMRPVESLG--FADOLKYYISDMHKAAFV  |
| L.major        | TVKXYAMIYIPTPYCGSIGTLVCAKSADTDVTVPMRPVESLG--FADOLKYYISDMHKAAFV  |
| L.braziliensis | TVKXYAMIYTPMPYCGSIGTLVCAKSVDTDITVPPRRPVESLG--FADELKYYISDMHRAAFV |
| T.brucei       | TVKXYAMITPTPYCGSIGSLICSKVAGVDVTPQVRRPVESMP--FAGELKYYISDVHKAAFV  |
| T.cruzi        | SVQYALMHVPTPYCGSIGTLVCSKKAGVDVTKPLRPVEDMP--FAKDLKYYISDMHKAFA    |
| M.musculus     | VVDYAYCSITPTYESGQIGFMFLCSKNPSTNFPQVQOLTQAOVEQOMOLKYYISDMHRAAFV  |
| H.sapiens      | VVDYAYCTIPTYESGQIGFMFLCSKNPSTNFPQVQOLTQAOVQOMOLKYYISDVHRAAFV    |
|                |                                                                 |
| L.donovani     | LPRFAAHLNE---                                                   |
| L.major        | LPRFAAHLNE---                                                   |
| L.braziliensis | LPRFAAYLNE---                                                   |
| T.brucei       | LPRFAHLNQNSY                                                    |
| T.cruzi        | LPRFAHINNSE-                                                    |
| M.musculus     | LPFETKALNDIS                                                    |
| H.sapiens      | LPFETAKALNDVS                                                   |

Sequences from *L. donovani* BPK282A1 LdBPK\_040570, *L. major* Friedlin LmjF.04.0580, *L. braziliensis* MHOM/BR/75/M2904 LbrM.04.0630, *T. cruzi* Dm28c 2017 BCY84\_20019, *Mus musculus* NP\_033298.1, *Homo sapiens* NP\_003123.2. were aligned using Clustal Omega. Boxshade was utilized to illustrate identical (black), conserved (grey) and divergent residues (white).
